# Supplementary material for: Multiscale modeling of influenza A virus replication in cell cultures predicts infection dynamics for highly different infection conditions
Source: PLoS Comput Biol. 2019 Feb 19;15(2):e1006819. doi: 10.1371/journal.pcbi.1006819 (PMC6396949; doi:10.1371/journal.pcbi.1006819)
Supplement: S1 Table — (DOCX) [file pcbi.1006819.s009.docx]

**S1 Table. Initial conditions for the extended multiscale model.**

| **MOI condition** | **Figure** | **Submodel** | **Non-zero initial conditions** |
| --- | --- | --- | --- |
| MOI 73 | Fig 2, 3, 4,  Fig 6 (dotted),  Fig S1, S3 | intracellular model |  |
|  |  |
| reduced intracellular model |  |
|  |  |
| extracellular model |  |
|  |
|  |
|  |
|  |
|  |
| MOI 3 | Fig 5A-C (dashed),  Fig 6 (dash-dotted) | intracellular model |  |
|  |  |
| reduced intracellular model |  |
|  |  |
| extracellular model |  |
|  |
|  |
|  |
|  |
| MOI 10-4 | Fig 5D-F (dashed),  Fig 6 (solid) | intracellular model |  |
|  |  |
| reduced intracellular model |  |
|  |  |
| extracellular model |  |
